# Supplementary material for: FLDS: A Comprehensive dsRNA Sequencing Method for Intracellular RNA Virus Surveillance
Source: PubMed Central journal article supplement (PMC4791113; doi:10.1264/jsme2.me15171), 2016-02-13
Supplement: 31_33_s1.pdf [file 31_33_s1.pdf]

Table S1: Origins of test FLDS reads.

| Blastn                  | Num. of reads | Reads (%) |
|-------------------------|---------------|-----------|
| MoCV1-A                 | 186,830       | 99.09     |
| MoCV1-A chimera         | 36            | 0.01      |
| Host fungal<br>sequence | 37            | 0.01      |
| No hits                 | 1,508         | 0.79      |
| Others                  | 132           | 0.07      |

Table S2: Overview of re-sequencing by FLDS for the MoCV1-A genome consisting of five segments.

| MoCV1-A segment | Reference length | Assembled length | Identity (%) | Total read count | Average coverage |
|-----------------|------------------|------------------|--------------|------------------|------------------|
| dsRNA1          | 3,554            | 3,554            | 100.0        | 7,979            | 499.2            |
| dsRNA2          | 3,250            | 3,250            | 99.9         | 31,532           | 2,093.1          |
| dsRNA3          | 3,074            | 3,074            | 100.0        | 47,813           | 3,398.3          |
| dsRNA4          | 3,043            | 3,043            | 100.0        | 79,226           | 5,617.5          |
| dsRNA5          | 2,879            | 2,879            | 99.9         | 20,280           | 1,508.4          |

Table S3: Viral incomplete composite genomes from a diatom colony obtained using FLDS.

| RNA contig name | Size (nt) | Num. of mapped reads | Average coverage | BlastX analysis                                                       |                      |                      |
|-----------------|-----------|----------------------|------------------|-----------------------------------------------------------------------|----------------------|----------------------|
|                 |           |                      |                  | Top Hit, Virus family                                                 | E-value              | Protein              |
| Contig-1        | 5,005     | 658                  | 29               | <i>Armigeres subalbatus</i> virus SaX06-AK20<br><i>Totiviridae</i>    | $6 \times 10^{-28}$  | CP                   |
| Contig-2        | 7,822     | 697                  | 22               | Potato mop-top virus<br><i>Virgaviridae</i>                           | $4 \times 10^{-24}$  | RdRp                 |
| Contig-3        | 6,812     | 290                  | 10               | <i>Pseudomonas phage phi12</i><br><i>Cystoviridae</i>                 | 0.011 <sup>a)</sup>  | RdRp                 |
| Contig-4        | 1,690     | 309                  | 31               | <i>Cryphonectria hypovirus 1</i><br><i>Hypoviridae</i>                | $7 \times 10^{-16}$  | hypothetical protein |
| Contig-5        | 2,837     | 228                  | 18               | Penaeid shrimp infectious myonecrosis virus<br><i>Totiviridae</i>     | $4 \times 10^{-34}$  | RdRp                 |
| Contig-6        | 12,744    | 1,398                | 27               | Grapevine endophyte endornavirus<br><i>Endornaviridae</i>             | $1 \times 10^{-136}$ | Polyprotein          |
| Contig-7        | 2,499     | 130                  | 13               | Rhizoctonia mitovirus 1 RS002<br><i>Narnaviridae</i>                  | $8 \times 10^{-40}$  | RdRp                 |
| Contig-8        | 3,513     | 183                  | 12               | <i>Beauveria bassiana</i> victorivirus NZL/1980<br><i>Totiviridae</i> | $1 \times 10^{-13}$  | CP                   |
| Contig-9        | 3,176     | 166                  | 12               | <i>Coniothyrium minitans</i> RNA virus<br><i>Totiviridae</i>          | $8 \times 10^{-110}$ | RdRp                 |
| Contig-10       | 2,476     | 112                  | 10               | <i>Phytophthora infestans</i> RNA virus 4<br><i>Narnaviridae</i>      | $1 \times 10^{-8}$   | RdRp                 |
| Contig-11       | 1,013     | 64                   | 14               | <i>Helicobasidium mompa</i> totivirus 1-17<br><i>Totiviridae</i>      | $3 \times 10^{-42}$  | RdRp                 |

<sup>a)</sup> The predicted amino acid sequence of Contig-3 showed significant homology ( $2e^{-16}$ ) with previously identified, but unpublished Cystovirus.

Table S4: Relative abundance of the sequence reads mapped on rRNA sequences constructed by EMIRGE at the phylum level with more than 0.1% relative abundance

| Domain    | Phylum<br>Species            | Ratio (%) |
|-----------|------------------------------|-----------|
| Eucaryota | Stramenopiles <sup>a)</sup>  | 80.1      |
|           | <i>Achnanthes</i> sp.        | 65.8      |
|           | <i>Cylindrotheca</i> sp.     | 6.7       |
|           | others                       | 7.4       |
|           | Viridiplantae                | 10.7      |
|           | <i>Cladophora</i> sp.        | 10.5      |
|           | others                       | 0.1       |
|           | Opisthokonta                 | 1.3       |
|           | Amoebozoa                    | 0.5       |
|           | Alveolata                    | 0.4       |
| Bacteria  | Bacteroidetes/Chlorobi group | 1.0       |
|           | Proteobacteria               | 0.5       |
|           | Cyanobacteria                | 0.2       |
| Others    | Other cellular organisms     | 2.3       |
|           | Not assigned                 | 2.3       |

<sup>a)</sup> Reference sequences were classified using MEGAN software.

Table S5: Protein accession numbers for the phylogenetic analysis of RNA viruses.

| Virus                                      | abbreviations | Accession number |
|--------------------------------------------|---------------|------------------|
| Aspergillus foetidus slow virus 1          | AfV-S1        | CCD33024.1       |
| Aspergillus mycovirus 178                  | AsV178        | ABX79995.1       |
| Atkinsonella hypoxylon virus               | AhV-2H        | AAA61829.1       |
| Beauveria bassiana RNA virus 1             | BbRV1         | CCC42235.1       |
| Beet cryptic virus 1                       | BCV-1-Hun     | YP_002308574.1   |
| Beet cryptic virus 3                       | BCV3          | AAB27624.1       |
| Bell pepper endornavirus                   | BPEV          | BAK52155.1       |
| Black raspberry cryptic virus              | BrCV          | ABU55400.1       |
| Botryotinia fuckeliana partitivirus 1      | BfPV1         | YP_001686789.1   |
| Cell fusing agent virus                    | CFAV          | NP_041725.1      |
| Chalara endornavirus CeEV1                 | CeEV1         | ADN43901.1       |
| Coniothyrium minitans RNA virus            | CmRV          | AAO14999.1       |
| Cryphonectria parasitica mitovirus 1-NB631 | CMV-1         | AAA61703.1       |
| Cryptosporidium parvum virus 1             | CSpV1-KSU1    | AAC47805.1       |
| Discula destructiva virus 1                | DdV1-247      | NP_116716.1      |
| Dromedary picobirnavirus                   | DroPBV        | KM573805.1       |
| Enterobacteria phage MS2                   | MS2           | ACY07217.1       |
| Epichloe festucae virus 1                  | EfV-1         | CAK02788.1       |
| Feline picobirnavirus                      | FelPBV        | KF792838.1       |
| Fox picobirnavirus                         | FoxPBV-F5     | AGK45545.1       |
| Grapevine endophyte endornavirus           | GeEV          | YP_007003829.1   |
| Gremmeniella abietina RNA virus L1         | GaRV-L1       | AAK11656.1       |
| Gremmeniella abietina RNA virus MS1        | GaRV-MS1      | NP_659027.1      |
| Gremmeniella mitovirus S1                  | GMV-S1        | AAN05635.1       |
| Giardia lamblia virus                      | GLV           | AAB01579.1       |
| Helminthosporium victoriae virus 190S      | Hv190S        | AAB94791.2       |
| Helicobasidium mompa endornavirus 1        | HmEV1-670     | BAE94538.1       |
| Helicobasidium mompa mitovirus 1-18        | HMV-1         | BAD72871.1       |
| Helicobasidium mompa partitivirus V1-1     | HmV-V1-1      | BAD32677.1       |
| Helicobasidium mompa totivirus 1-17        | HmTV1-17      | BAC81754.1       |
| Helminthosporium victoriae 145S virus      | Hv145S        | YP_052858.1      |
| Hepatitis GB virus B                       | GBV-B         | Q69422.1         |
| Human picobirnavirus Hy005102              | Hu_PBV-H      | BAD98236.1       |
| Human picobirnavirus                       | Hu_PBV        | AAG53584.1       |
| Leishmania RNA virus 1 - 1                 | LRV-1-1       | AAB50024.1       |
| Leishmania RNA virus 2 - 1                 | LRV-2-1       | AAB50031.1       |
| Magnaporthe oryzae virus 2                 | MoV2          | YP_001649206.1   |
| Magnaporthe oryzae virus 1                 | MoV1          | BAD60833.1       |
| Magnaporthe oryzae chrysovirus 1 strain A  | MoCV1-A       | YP_003858286.1   |
| Mycovirus FusoV                            | FsV1          | NP_624350.1      |
| Ophiostoma mitovirus 1a                    | OMV-1a        | CAJ32466.1       |
| Ophiostoma mitovirus 3a                    | OMV-3a        | NP_660176.1      |
| Ophiostoma mitovirus 4                     | OMV-4         | NP_660179.1      |
| Ophiostoma mitovirus 5                     | OMV-5         | NP_660180.1      |
| Ophiostoma mitovirus 6                     | OMV-6         | NP_660181.1      |
| Oryza sativa endornavirus                  | OsEV-Nip      | BAA06862.1       |
| Otarine picobirnavirus                     | OtaPBV        | JQ776552.1       |

|                                         |          |                |
|-----------------------------------------|----------|----------------|
| Persimmon cryptic virus                 | PeCV     | YP_006390091.1 |
| Phaseolus vulgaris endornavirus 1       | PvEV-1   | BAM68539.1     |
| Phaseolus vulgaris endornavirus 2       | PvEV-2   | BAM68540.1     |
| Phomopsis vexans RNA virus              | PvRV     | YP_009115492.1 |
| Phytophthora endornavirus 1             | PEV1-OR  | CAI47561.1     |
| Picobirnavirus bovine/RUBV-P/IND/2005   | BoPBV    | ACT64131.1     |
| Picobirnavirus cow/tottori7944/Jap/2013 | CowPBV   | AB828072.1     |
| Picobirnavirus TK/MN/2011               | TKPBV    | KJ495690.1     |
| Picobirnavirus monkey/CHN-14/2002       | MonPBV   | JQ710506.1     |
| Picobirnavirus mouse/M-58/USA/2008      | MouPBV   | JF755419.1     |
| Enterobacteria phage MS2                | MS2      | ACY07217.1     |
| Porcine picobirnavirus pig/SD           | PorcPBVp | ADO22678.1     |
| Pyrus pyrifolia cryptic virus           | PpCV     | BAA34783.1     |
| Rose cryptic virus 1                    | RoCV1    | YP_001686786.1 |
| Rosellinia necatrix partitivirus 1-W8   | RnV1-W8  | YP_392480.1    |
| Rosellinia necatrix victorivirus 1      | RnVV1    | YP_008130308.1 |
| Saccharomyces 20S RNA narnavirus        | ScNV-20S | AAC98925.1     |
| Saccharomyces 23S RNA narnavirus        | ScNV-23S | AAC98708.1     |
| Saccharomyces cerevisiae virus L-A      | ScV-L-A  | AAA50508.1     |
| Saccharomyces cerevisiae virus L-BC     | ScV-L-BC | AAB02146.1     |
| Sphaeropsis sapinea RNA virus 1         | SsRV1    | AAD11601.1     |
| Sphaeropsis sapinea RNA virus 2         | SsRV2    | AAD11603.1     |
| Tamana bat virus                        | TABV     | AF285080       |
| Trichomonas vaginalis virus 1           | TVV1     | AAA62868.1     |
| Trichomonas vaginalis virus 2           | TVV2     | AAF29445.1     |
| Trichomonas vaginalis virus 3           | TVV3     | AAL37370.1     |
| Tuber excavatum mitovirus               | TeMV     | AEP83726.1     |
| Ustilaginoidea virens RNA virus 1       | UvRV1    | YP_007761589.1 |
| Ustilaginoidea virens RNA virus 3       | UvRV3    | YP_009004156.1 |
| Ustilago maydis virus H1                | UmV-H1   | AAA81884.1     |
| Vicia faba endornavirus                 | VfEV-447 | CAA04392.1     |
| White clover cryptic virus 1            | WCCV1    | AAU14888.1     |

---

## Figure legends

Figure S1: Agarose gel (1%) electrophoresis of PCR-amplified cDNA after FLDS from *M. oryzae* strain S-0412-II. DNA after 25 cycles of PCR was visualized with ethidium bromide. Template cDNA was prepared with (lane 1) or without (lane 2) dsRNA-specific digestion by ShortCut RNaseIII (NEB).

Figure S2: Coverage of sequence reads for each dsRNA segment of MoCV1-A. Sequence coverage for each position along the genome segments is shown in black (left axis). GC skew of the MoCV1-A genome is shown in grey (right axis).

Figure S3: Agarose gel (1%) electrophoresis of the PCR-amplified cDNA after FLDS from the diatom colony. DNA after 40 cycles of PCR was visualized with ethidium bromide. Template cDNA was prepared with (lane 1) or without (lane 2) dsRNA-specific digestion by ShortCut RNaseIII (NEB).

Figure S4: Phylogenetic analysis of RNA replicases (RdRp) found in dsRNA contigs based on amino acid residues. Phylogenetic trees were calculated using MrBayes 3.2.3 and visualized using FigTree 1.4.2 software. The number above each branch refers to the Bayesian posterior probability. The scale bars represent substitutions per site. (A) Phylogenetic tree of the RdRp sequences encoded by 13 *Totiviridae*-related DCADSRVs and 24 selected representative viruses of the family *Totiviridae*. Hv145S was used as an outgroup. (B) Phylogenetic tree of the RdRp sequences encoded by DCADSRV-1 and 12 other selected viruses of the family *Picobirnaviridae*. (C) Phylogenetic tree of the RdRp sequences encoded by DCADSRV-14 and 14 other selected viruses of the family *Partitiviridae*. HvV145S was used as an outgroup. (D) Phylogenetic unrooted tree of the RdRp encoded by DCASSRV-1 and 48 selected viruses of the family *Flaviviridae*. (E) Phylogenetic trees of the RdRp sequences encoded by DCASSRV-2 and six other selected viruses infecting fungi or

oomycetes of the family *Narnaviridae*. MS2 was used as an outgroup. Abbreviations and accession numbers of virus names are listed in Table S5.



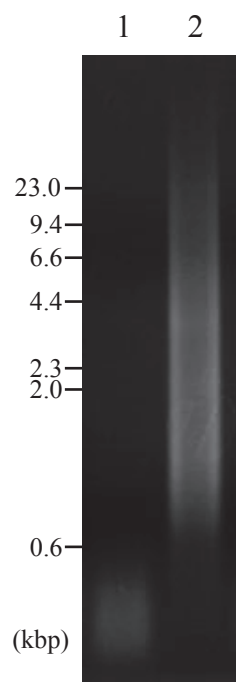

Figure S1  
Syun-ichi Urayama

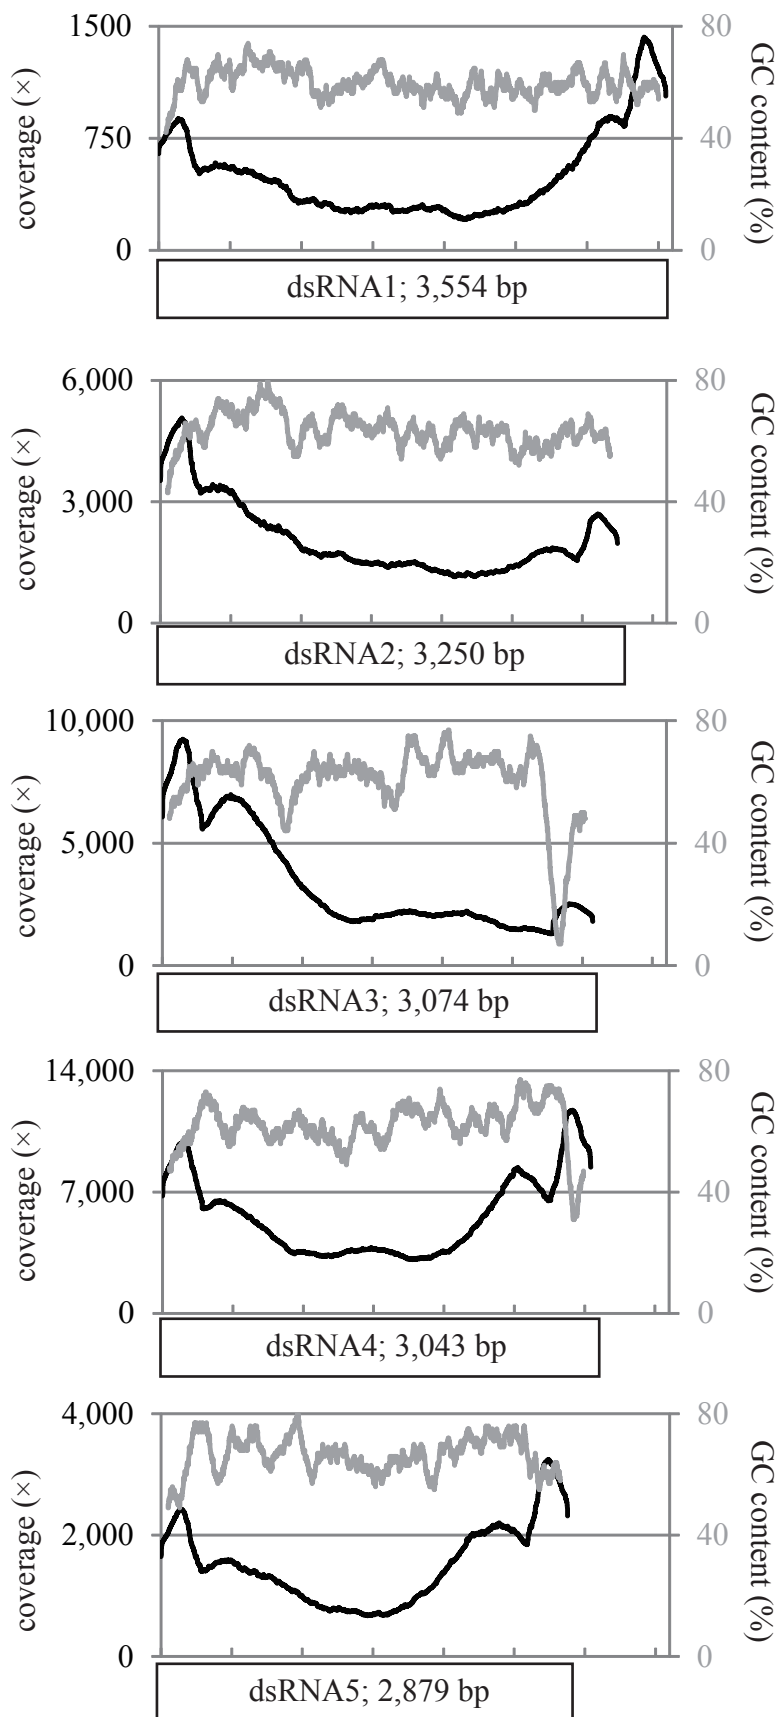

Figure S2  
Syun-ichi Urayama

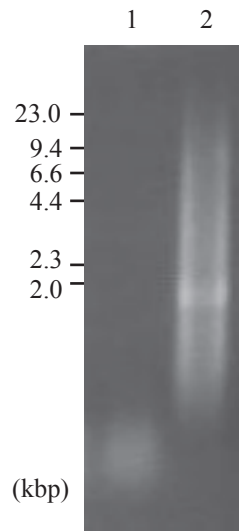

Figure S3  
Syun-ichi Urayama

(A)

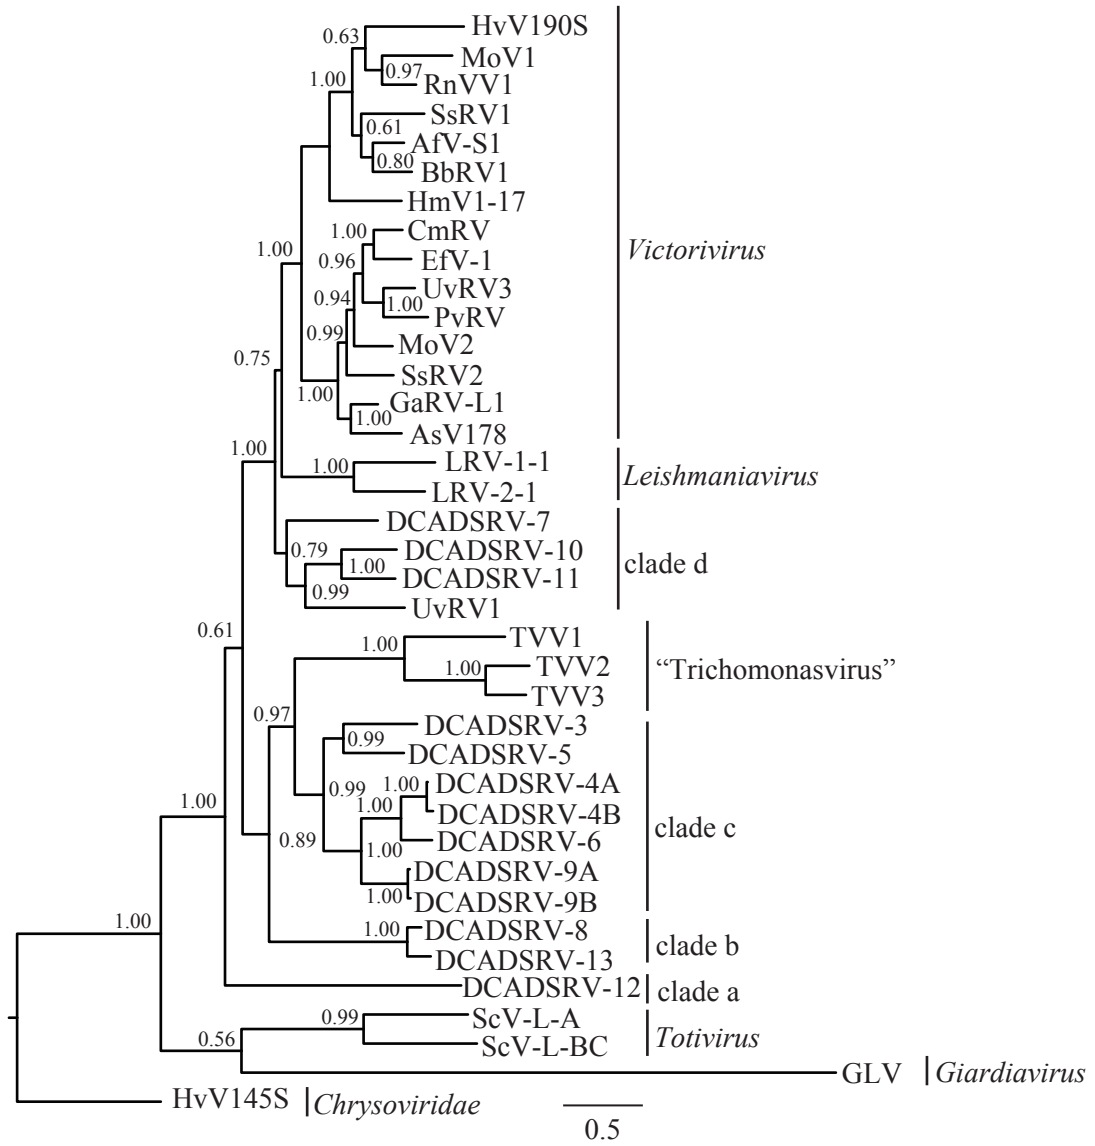

(B)

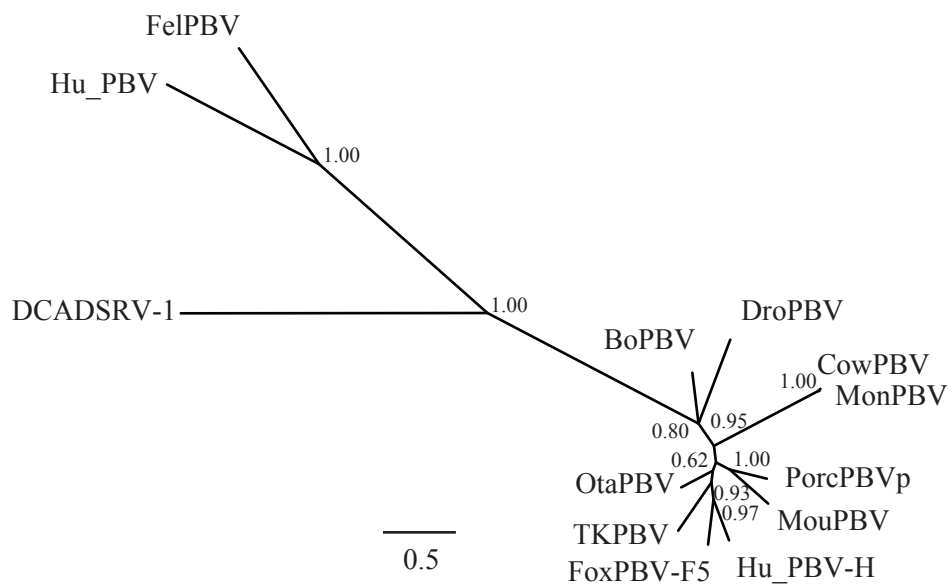

Figure S4  
Syun-ichi Urayama

(C)

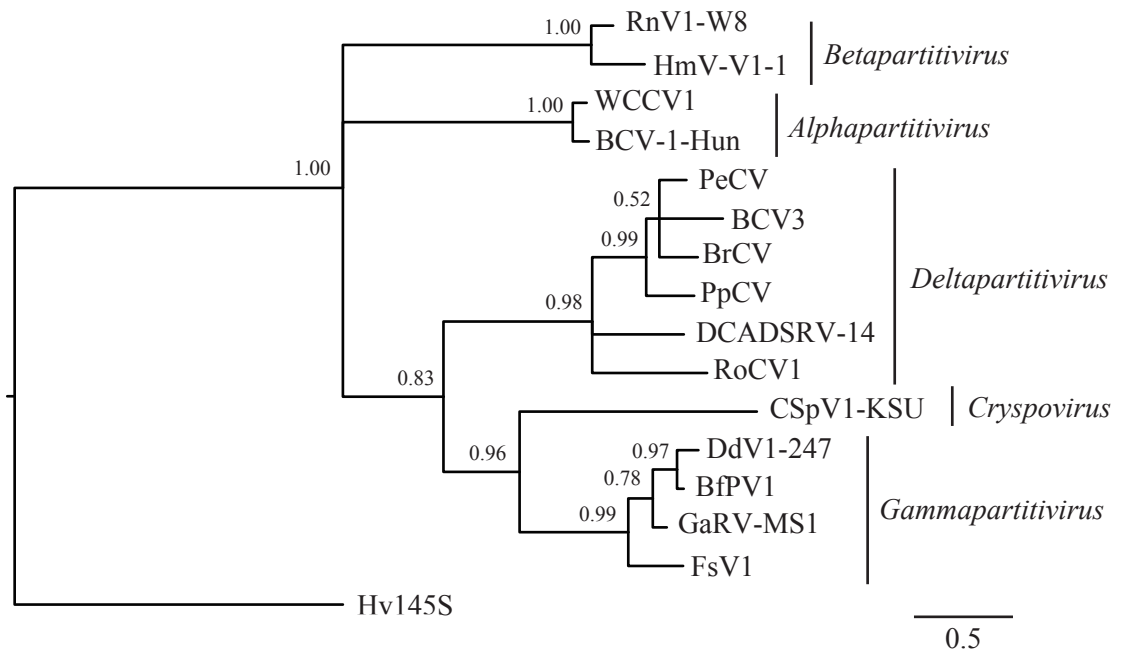

(D)

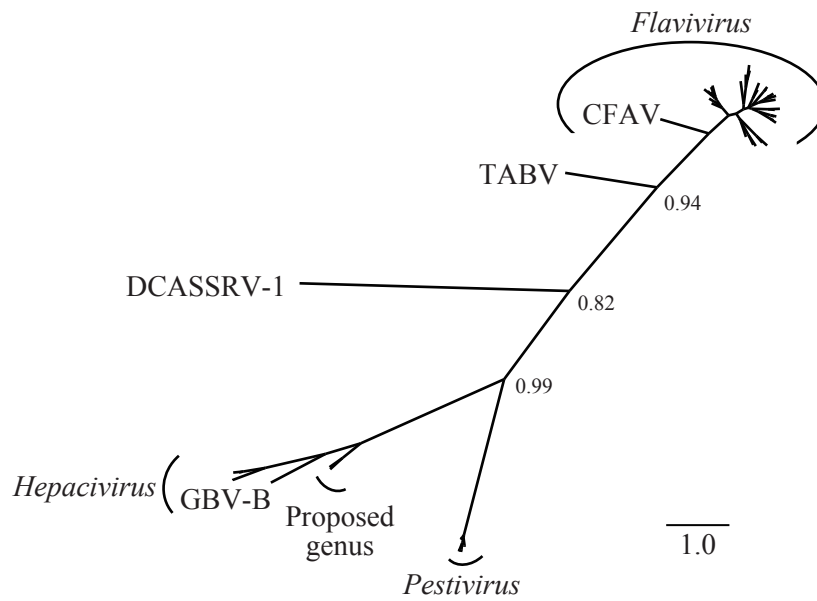

Figure S4  
Syun-ichi Urayama

(E)

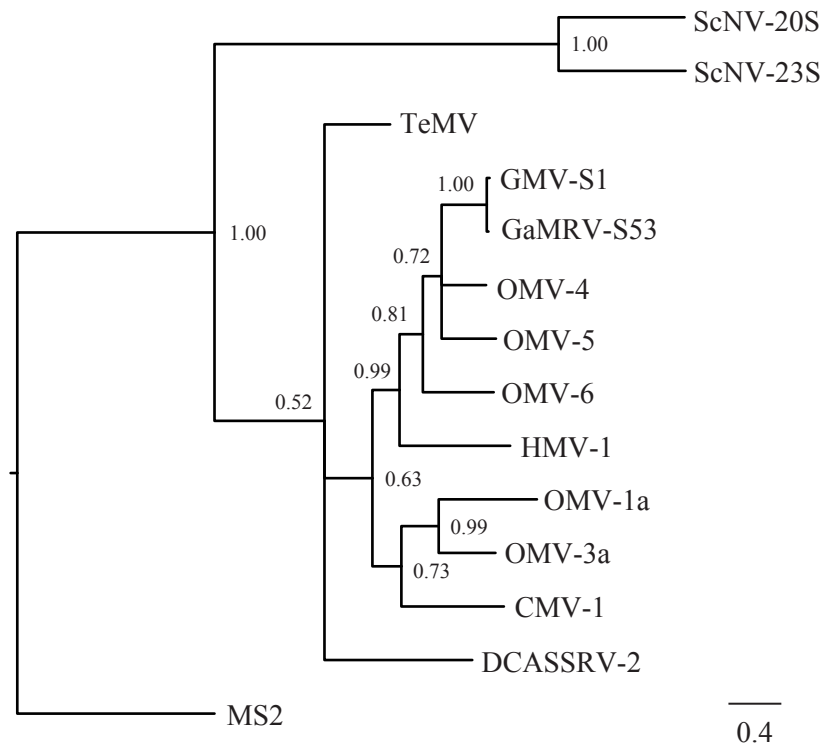

Figure S4  
Syun-ichi Urayama
